# Supplementary material
Source: PubMed Central journal article supplement (PMC4742346)

Figure S1

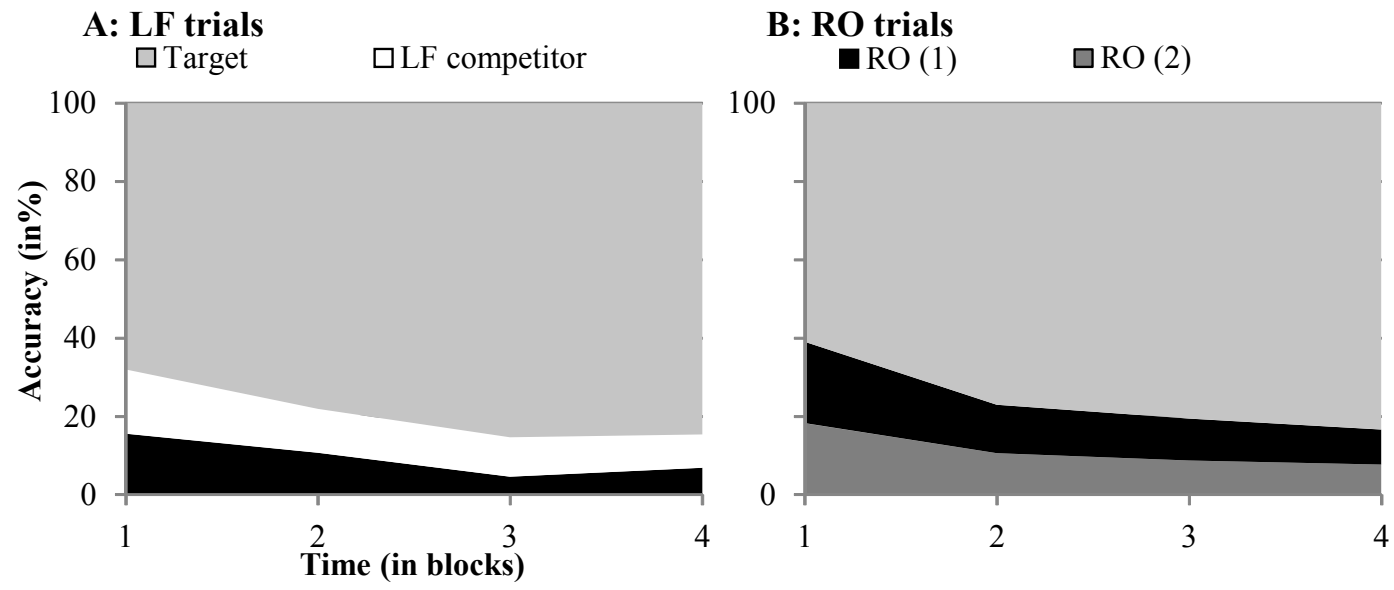

Figure S2

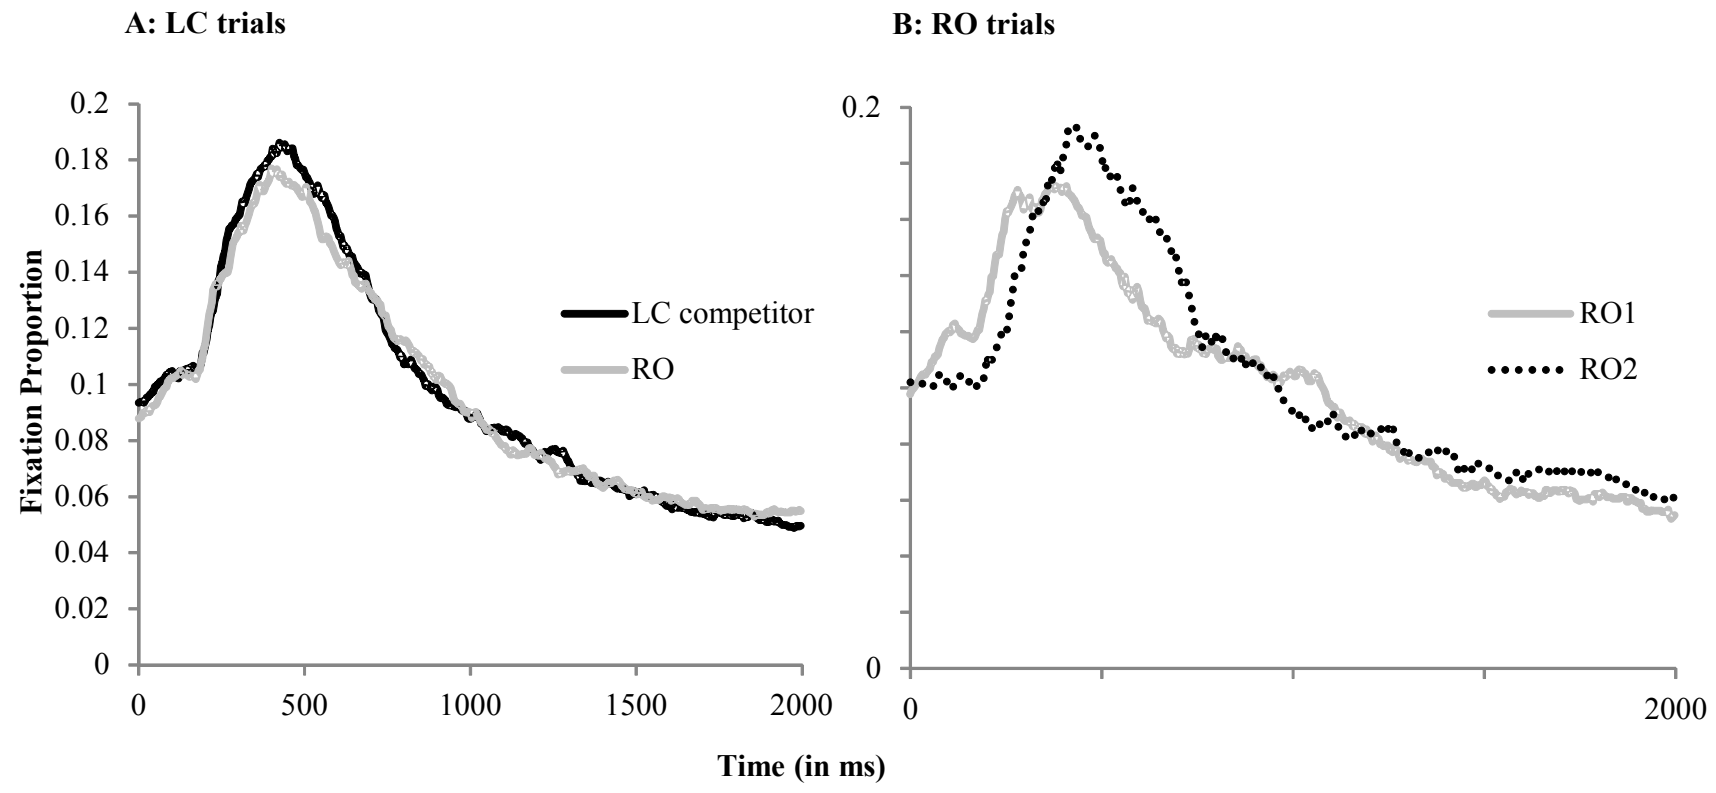

Supplement: NIHMS736443-supplement-01.pdf [file NIHMS736443-supplement-01.pdf]
